# Supplementary material
Source: Springer Nature journal article supplement (https://www.springerprofessional.de/resource/supplementary/40327_2013_5_MOESM7_ESM.pdf/10801436)

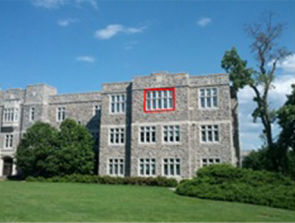

(a)

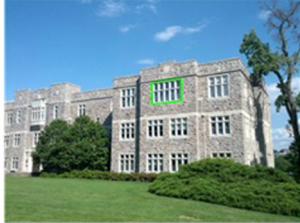

(b)

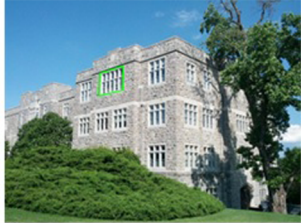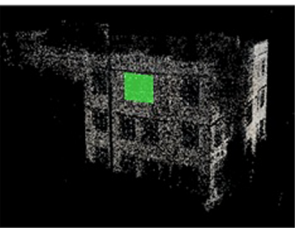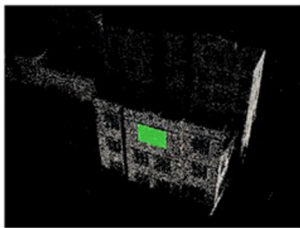

(c)

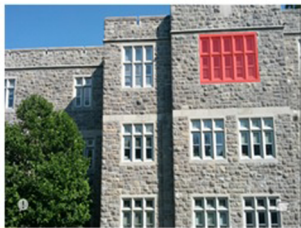

(d)

Supplement: MOESM7 [file 10801436]
